# Supplementary material for: Identification of Genetic Variation on the Horse Y Chromosome and the Tracing of Male Founder Lineages in Modern Breeds
Source: PLOS journal article supplement (doi:10.1371/journal.pone.0060015), 2013-04-03

**Fig. S6. Information on the polymorphic site YE17.1 - Pos 1277**

(a) Sequence alignment (HT1,4,5,6, HTPrz1,2; HT2,3; Reference from BAC clone E; homologous sequence on EcaX) with primer positions underlined. Positions identical to the sequence in the first row are represented with a hyphen. The mutation leading to HT2/3 is marked. (b) PCR products amplified from male (m) and female (f) genomic DNA and a no-template-control (-). (c) Capillary sequence traces of the confirmed mutations in HT1,4,5,6 and HT2,3 respectively.

**A**

|                      |                   |                   |                  |            |             |                   |      |
|----------------------|-------------------|-------------------|------------------|------------|-------------|-------------------|------|
| YE17_HT1/4/5/6/HTPrz | <u>TCTGAGGTGG</u> | TGAGAGAATC        | ATACTTGAGA       | GCACATGTTG | CAAAGCCAAG  | <u>ATGCAGGGCC</u> | 1166 |
| YE17_HT2/3           | -----             | -----             | -----            | -----      | -----       | -----             |      |
| YE17-BACcontig       | -----             | -----             | -----            | -----      | -----       | -----             |      |
| ecaX:6089749-6071249 | --c-----          | -cca-----         | -----            | -agtg----- | -----       | -----             |      |
|                      |                   |                   |                  |            |             |                   |      |
| YE17_HT1/4/5/6/HTPrz | <u>TAAGTTGTTT</u> | <u>GCAGAGAGCA</u> | AGATTACCTC       | CTGGGACAAC | TAGAGCAGGA  | <u>CCCAGAGGTG</u> | 1126 |
| YE17_HT2/3           | -----             | -----             | -----            | -----      | -----       | -----             |      |
| YE17-BACcontig       | -----             | -----             | -----            | -----      | -----       | -----             |      |
| ecaX:6089749-6071249 | -----t            | -----g-           | -----            | -----      | -c-g-----   | -----             |      |
|                      |                   |                   |                  |            |             |                   |      |
| YE17_HT1/4/5/6/HTPrz | CTGCCTTTC         | AACAGAGCTA        | GGCTTCCATG       | AA...TGAC  | TCTCGAGTTC  | <u>TACATTCACA</u> | 1282 |
| YE17_HT2/3           | -----             | -----             | -----            | ...        | -----       | <u>A</u>          |      |
| YE17-BACcontig       | -----             | -----             | -----            | ...        | -----       | -----             |      |
| ecaX:6089749-6071249 | -----c-           | -----c-           | -----            | -cagt----- | -----       | c-----            |      |
|                      |                   |                   |                  |            |             |                   |      |
| YE17_HT1/4/5/6/HTPrz | GTTTGAGATT        | ACTGTTTAGA        | AAGCACACTT       | CTGTTGGTTG | CAGGCGTGAA  | TAACAGTGAT        | 1342 |
| YE17_HT2/3           | -----             | -----             | -----            | -----      | -----       | -----             |      |
| YE17-BACcontig       | -----             | -----             | -----            | -----      | -----       | -----             |      |
| ecaX:6089749-6071249 | -----g--          | -gga-----         | -----t-----      | -c-----t   | cggggtgtgag | tcac-----         |      |
|                      |                   |                   |                  |            |             |                   |      |
| YE17_HT1/4/5/6/HTPrz | TGTATAAAGT        | GTAGAATCAC        | TTATTAGAAA       | TCAGAGACAA | TCTATCTGTT  | GTTCAGCCGG        | 1402 |
| YE17_HT2/3           | -----             | -----             | -----            | -----      | -----       | -----             |      |
| YE17-BACcontig       | -----             | -----             | -----            | -----      | -----       | -----             |      |
| ecaX:6089749-6071249 | .....             | .....             | .....            | .....-g    | -----cc     | c-----t-          |      |
|                      |                   |                   |                  |            |             |                   |      |
| YE17_HT1/4/5/6/HTPrz | GTGGA...CA        | <u>CTGGACACCA</u> | <u>CCAGTCAGG</u> | CTGTCCGATG | CTGGAGAACA  | ACGATGCTAC        | 1458 |
| YE17_HT2/3           | -----             | -----             | -----            | -----      | -----       | -----             |      |
| YE17-BACcontig       | -----             | -----             | -----            | -----      | -----       | -----             |      |
| ecaX:6089749-6071249 | ---gatg--         | ---t---           | -g-----g         | t---t---   | -----       | -a-----           |      |

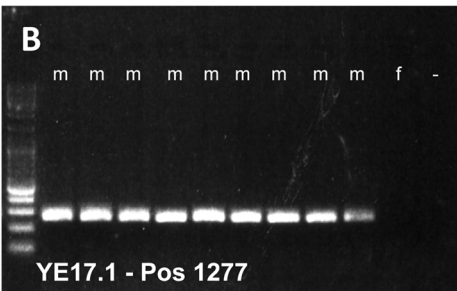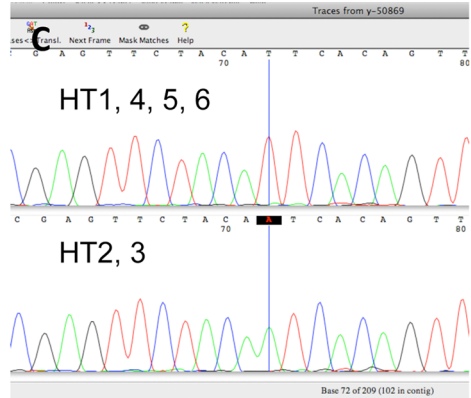

Supplement: S6 (10.1371/journal.pone.0060015.s006) [file journal.pone.0060015.s006]
