# Supplementary material for: Identification of Genetic Variation on the Horse Y Chromosome and the Tracing of Male Founder Lineages in Modern Breeds
Source: PLOS journal article supplement (doi:10.1371/journal.pone.0060015), 2013-04-03

**Fig. S7. Information on the polymorphic site YM23 - Pos 4161**

(a) Sequence alignment (HT1,2,3,4,5,6; HTPrz1; HTPrz2; Reference from BAC clone E) with primer positions underlined. Positions identical to the sequence in the first row are represented with a hyphen. The mutation leading to HTPrz2 is marked. (b) PCR products amplified from male (m) and female (f) genomic DNA and a no-template-control (-). (c) Capillary sequence traces of the confirmed mutations in HT1,2,3,4,5,6 and HTPrz1 and HTPrz2 respectively.

|                    |                    |            |                   |                   |                   |                   |            |      |
|--------------------|--------------------|------------|-------------------|-------------------|-------------------|-------------------|------------|------|
| <b>A</b>           | YM23_HT1/2/3/4/5/6 | TTTCGGATTG | ATGATCTCAT        | <u>GGAGCCTTCA</u> | <u>CCATCTTGTC</u> | <u>CACTTCGGCA</u> | GAGAGACTAC | 3840 |
|                    | YM23_HT1Prz2       | -----      | -----             | -----             | -----             | -----             | -----      |      |
|                    | YM23_HT1Prz1       | -----      | -----             | -----             | -----             | -----             | -----      |      |
|                    | YM23-BACcontig     | -----      | -----             | -----             | -----             | -----             | -----      |      |
|                    | YM23_HT1/2/3/4/5/6 | AGACCCCTTT | ACTGAGGAGA        | AAAGTGAGAC        | ACCTTTCATA        | GCGATATCCT        | AATCTGCAAT | 3900 |
|                    | YM23_HT1Prz2       | -----      | -----             | -----             | -----             | -----             | -----      |      |
|                    | YM23_HT1Prz1       | -----      | -----             | -----             | -----             | -----             | -----      |      |
| YM23-BACcontig     | -----              | -----      | -----             | -----             | -----             | -----             |            |      |
| YM23_HT1/2/3/4/5/6 | CTGCGTGCCT         | TTAAACGGCA | ACACCTCCCA        | CGCAGTCTTA        | CCCTTCCACC        | TAGCTTCAGG        | 3960       |      |
| YM23_HT1Prz2       | -----              | -----      | -----             | -----             | -----             | -----             |            |      |
| YM23_HT1Prz1       | -----              | -----      | -----             | -----             | -----             | -----             |            |      |
| YM23-BACcontig     | -----              | -----      | -----             | -----             | -----             | -----             |            |      |
| YM23_HT1/2/3/4/5/6 | AACTCAGTCT         | TCCCTGCTAG | CCCTTGGGGT        | TCTGAGCTTG        | CCTCCCTCAGA       | AGAGATAGGA        | 4020       |      |
| YM23_HT1Prz2       | -----              | -----      | -----             | -----             | -----             | -----             |            |      |
| YM23_HT1Prz1       | -----              | -----      | -----             | -----             | -----             | -----             |            |      |
| YM23-BACcontig     | -----              | -----      | -----             | -----             | -----             | -----             |            |      |
| YM23_HT1/2/3/4/5/6 | CCTTGCCCTT         | AGGTTTCCCG | CTCCCGCCTG        | CTAGACCCGC        | CGGTGCCCAG        | CCCCCGGAGT        | 4080       |      |
| YM23_HT1Prz2       | -----              | -----      | -----             | -----             | -----             | -----             |            |      |
| YM23_HT1Prz1       | -----              | -----      | -----             | -----             | -----             | -----             |            |      |
| YM23-BACcontig     | -----              | -----      | -----             | -----             | -----             | -----             |            |      |
| YM23_HT1/2/3/4/5/6 | CCTGGTGAAT         | GAGCTACAGA | GGCTCCAGGG        | AATTGAACTG        | CGGCGAAAGC        | AGGTACACGT        | 4140       |      |
| YM23_HT1Prz2       | -----              | -----      | -----             | -----             | -----             | -----             |            |      |
| YM23_HT1Prz1       | -----              | -----      | -----             | -----             | -----             | -----             |            |      |
| YM23-BACcontig     | -----              | -----      | -----             | -----             | -----             | -----             |            |      |
| YM23_HT1/2/3/4/5/6 | CCCACGTGGA         | ACACAGATTT | <u>GCAGACCTTC</u> | <u>TGCGACGAAA</u> | <u>GCTATGAGGC</u> | ACACGCCACA        | 4200       |      |
| YM23_HT1Prz2       | -----              | -----      | -----             | -----             | -----             | -----             |            |      |
| YM23_HT1Prz1       | -----              | -----      | -----             | -----             | -----             | -----             |            |      |
| YM23-BACcontig     | -----              | -----      | -----             | -----             | -----             | -----             |            |      |

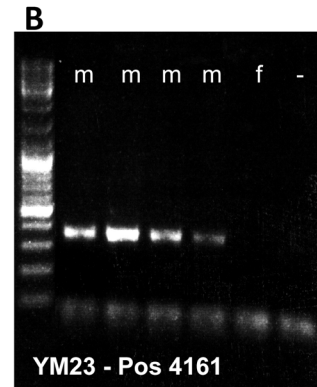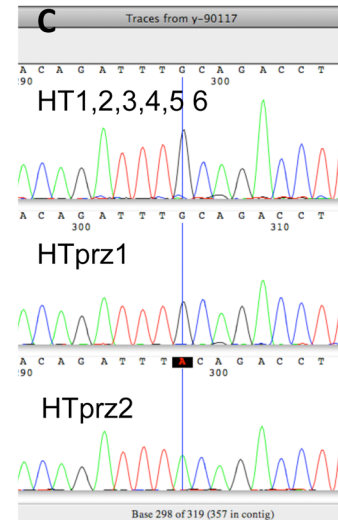

Supplement: S7 (10.1371/journal.pone.0060015.s007) [file journal.pone.0060015.s007]
