# Supplementary material for: Identification of Genetic Variation on the Horse Y Chromosome and the Tracing of Male Founder Lineages in Modern Breeds
Source: PLoS One. 2013 Apr 3;8(4):e60015. doi: 10.1371/journal.pone.0060015 (PMC3616054; doi:10.1371/journal.pone.0060015)

**Fig. S3. Information on the polymorphic site YXX\_24I23 - Pos 25345**

(a) Sequence alignment (HT1,2,3,5,6,HTPrz1,2; HT4; Reference YXX\_24I23 from genbank) with primer positions underlined. Positions identical to the sequence in the first row are represented with a hyphen. The mutation leading to HT4 is marked. b) PCR products amplified from male (m) and female (f) genomic DNA and a no-template-control (-). c) Capillary sequence traces of the confirmed mutations in HT1,2,3,5,6 and HT4, respectively.

**A**

|                            |                                                                   |       |
|----------------------------|-------------------------------------------------------------------|-------|
| YXX_24I23HT1/2/3/5/6/HTPrz | CTGTTAAGTA ATCACGGTTT AACTTTTCT CAGTAAAGC TTATGTTCCC TCCGGCCTTT   | 25260 |
| YXX_24I23HT4               | -----                                                             |       |
| ReferenceYXX_24I23         | -----                                                             |       |
| YXX_24I23HT1/2/3/5/6/HTPrz | ATGCTTAGC ATTTTAAAA CCTGTGGAAG GATAAAATTA GTACCAAGAT AAATGAGGAT   | 25320 |
| YXX_24I23HT4               | -----                                                             |       |
| ReferenceYXX_24I23         | -----                                                             |       |
| YXX_24I23HT1/2/3/5/6/HTPrz | AGATGGGGAA AAGGTTGAAA ATACGTTTAA CGTAGTTTAT GTCCTTCGTA AAACCTAAGA | 25380 |
| YXX_24I23HT4               | -----                                                             |       |
| ReferenceYXX_24I23         | -----                                                             |       |
| YXX_24I23HT1/2/3/5/6/HTPrz | CTATTAAC TGAGATGTGT AGATTCCAGA CCATATTTT TATTGTTTAC TTTTAGGTTA    | 25440 |
| YXX_24I23HT4               | -----                                                             |       |
| ReferenceYXX_24I23         | -----                                                             |       |
| YXX_24I23HT1/2/3/5/6/HTPrz | AAAAAACAA GCCATGTCAT GTTTTAAAG TGAACGTTGT ATACTGCAGC CCAAAAGAAT   | 25500 |
| YXX_24I23HT4               | -----                                                             |       |
| ReferenceYXX_24I23         | -----                                                             |       |

**B**

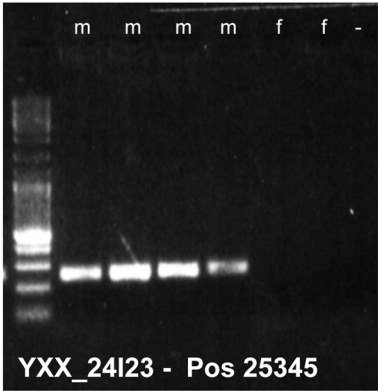

**C**

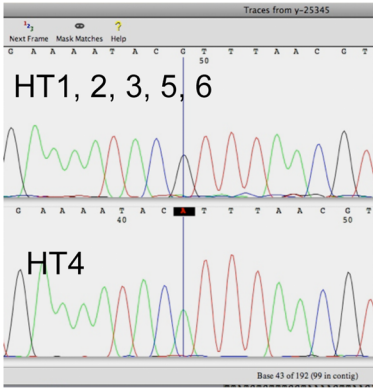

Supplement: Figure S3 — Information on the polymorphic site YXX_24I23 - Pos 25345. (PDF) [file pone.0060015.s003.pdf]
