# Supplementary material for: Identification of Genetic Variation on the Horse Y Chromosome and the Tracing of Male Founder Lineages in Modern Breeds
Source: PLOS journal article supplement (doi:10.1371/journal.pone.0060015), 2013-04-03

**Fig. S2. Male specificity of long range PCR products.**

LRP products amplified from male (m) and female (f) genomic DNA and no template control amplification (-) are separated on a 0,7 % agarosegel. Gene Ruler DNALadder mix (Thermo Scientific, #SM0331) was used as size standard. Amplicon identification is listed on the bottom of each image. Primers used are listed in Table S3. In case of multiple PCR products the Y chromosome specific amplicon (indicated by a red arrow) was isolated from the agarosegel prior NGS library preparation.

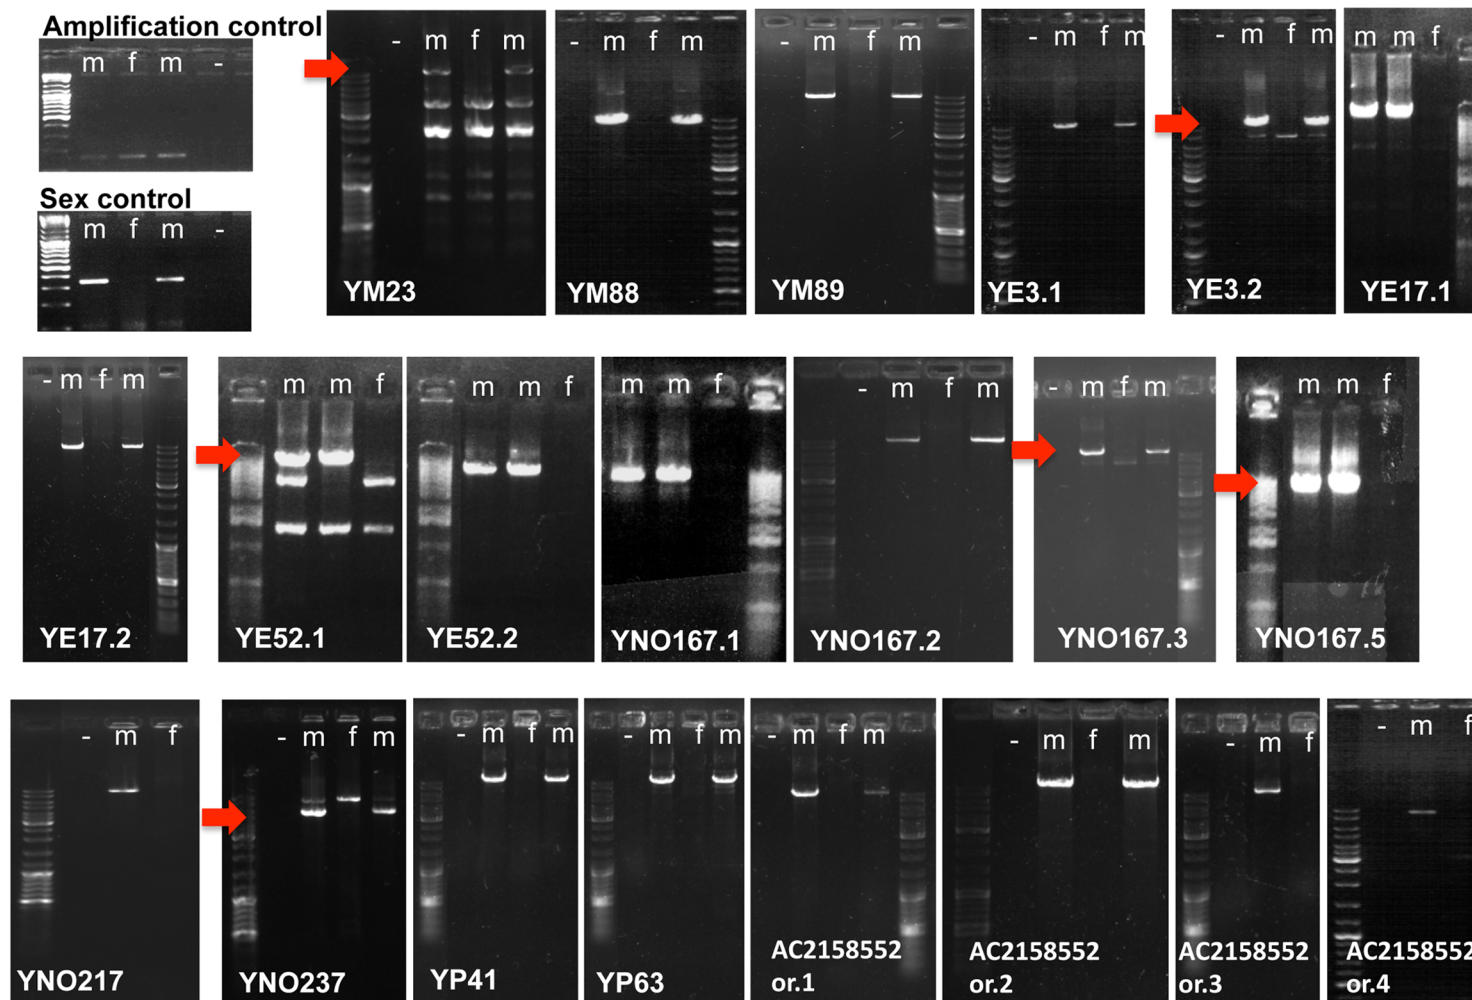

Supplement: S2 (10.1371/journal.pone.0060015.s002) [file journal.pone.0060015.s002]
