# Supplementary material for: Identification of Genetic Variation on the Horse Y Chromosome and the Tracing of Male Founder Lineages in Modern Breeds
Source: PLOS journal article supplement (doi:10.1371/journal.pone.0060015), 2013-04-03

**Fig. S5. Information on the polymorphic site YE3 - Pos 1007-12040**

(a) Sequence alignment (HT1,2,3,4 HTPrz1,2; HT5; HT6; Reference from BAC clone E; homologous sequence on EcaX) with primer positions underlined. Positions identical to the sequence in the first row are represented with a hyphen. The variants explained as gene conversion leading to HT5 are marked . b) PCR products amplified from male (m) and female (f) genomic DNA and a no-template-control (-) when placing the reverse primer in a Y-exclusive region (underlined.) (c) Capillary sequence traces of the polymorphic region HT1,2,3,4 and HT5, respectively.

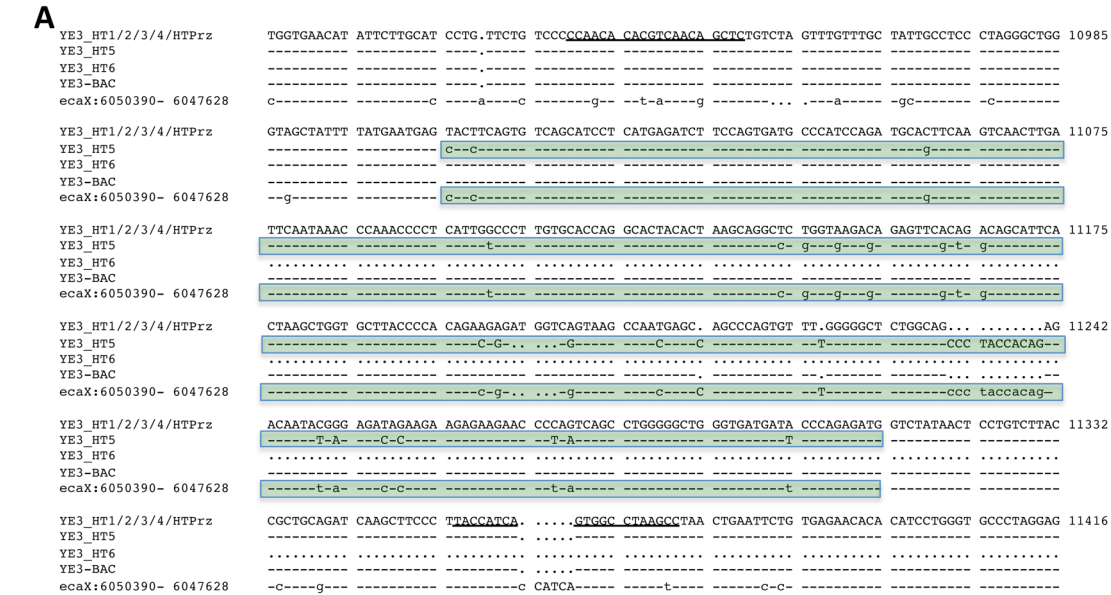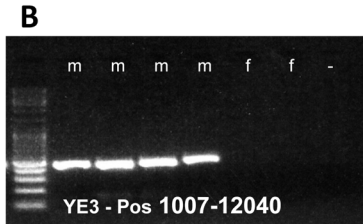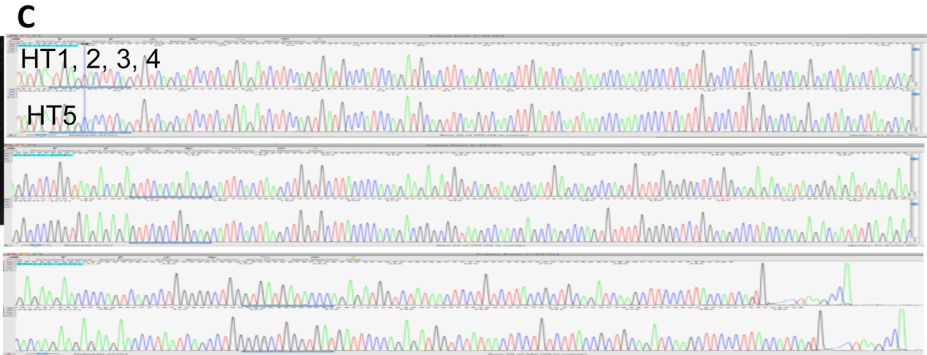

Supplement: S5 (10.1371/journal.pone.0060015.s005) [file journal.pone.0060015.s005]
