# Supplementary material for: Identification of Genetic Variation on the Horse Y Chromosome and the Tracing of Male Founder Lineages in Modern Breeds
Source: PLOS journal article supplement (doi:10.1371/journal.pone.0060015), 2013-04-03

**Fig. S8. Information on the polymorphic site YE3 - Pos 11076-12042 deleted**

(a) Sequence region and primer position leading to a 2010 bp amplicon in HT1,2,3,4,5 and a 1044 bp product in HT6 (Shetland ponies). (b) Alignment (X-, Y-homologue) of the Y-specific reverse primer position (arrow). (c) PCR products amplified from male HT1,2,6 (m) and female (f) genomic DNA and a no-template-control (-) when using primers from Table S10.

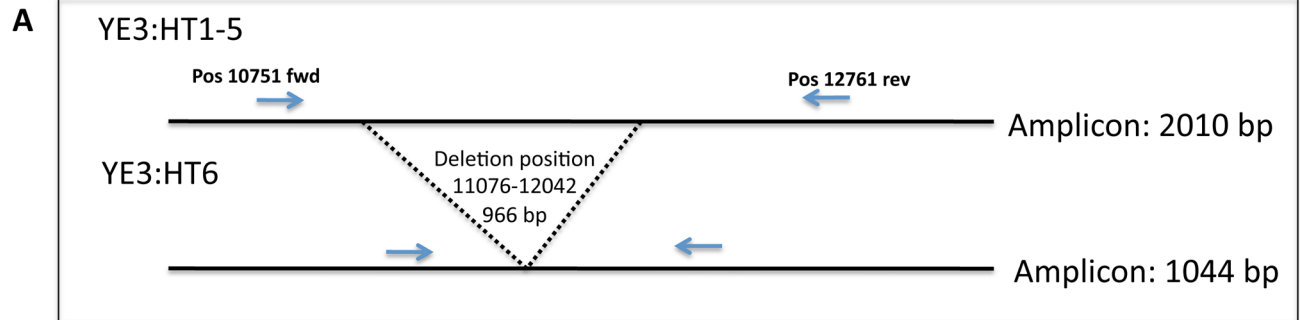

**B**

|                       |                                 |
|-----------------------|---------------------------------|
| YE3_HT1/2/3/4/5/6     | CTGTCCCTTTCATCCAACCTGCCTACTGGGG |
| ecaX:6050390- 6047628 | ←<br>TTG-G-----TT-----          |

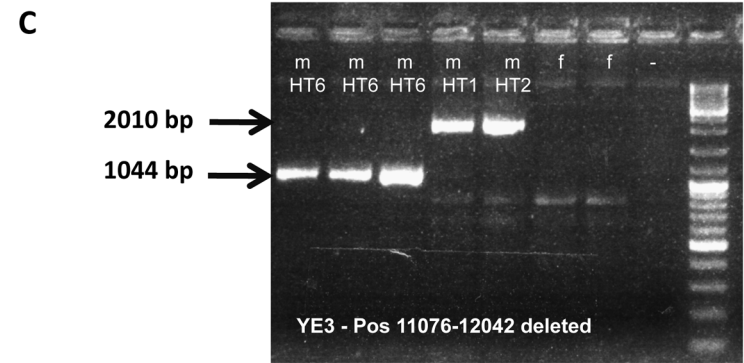

Supplement: S8 (10.1371/journal.pone.0060015.s008) [file journal.pone.0060015.s008]
