# Supplementary material for: Identification of Genetic Variation on the Horse Y Chromosome and the Tracing of Male Founder Lineages in Modern Breeds
Source: PLOS journal article supplement (doi:10.1371/journal.pone.0060015), 2013-04-03

**Fig. S10. Details on the import of Original Arabian stallions**

Documented imports (with date) of Arabian horses carrying either HT1 (blue) or HT2 (yellow) to Central European studs (Oriental wave) and the spreading of the English thoroughbred (HT3 – red).

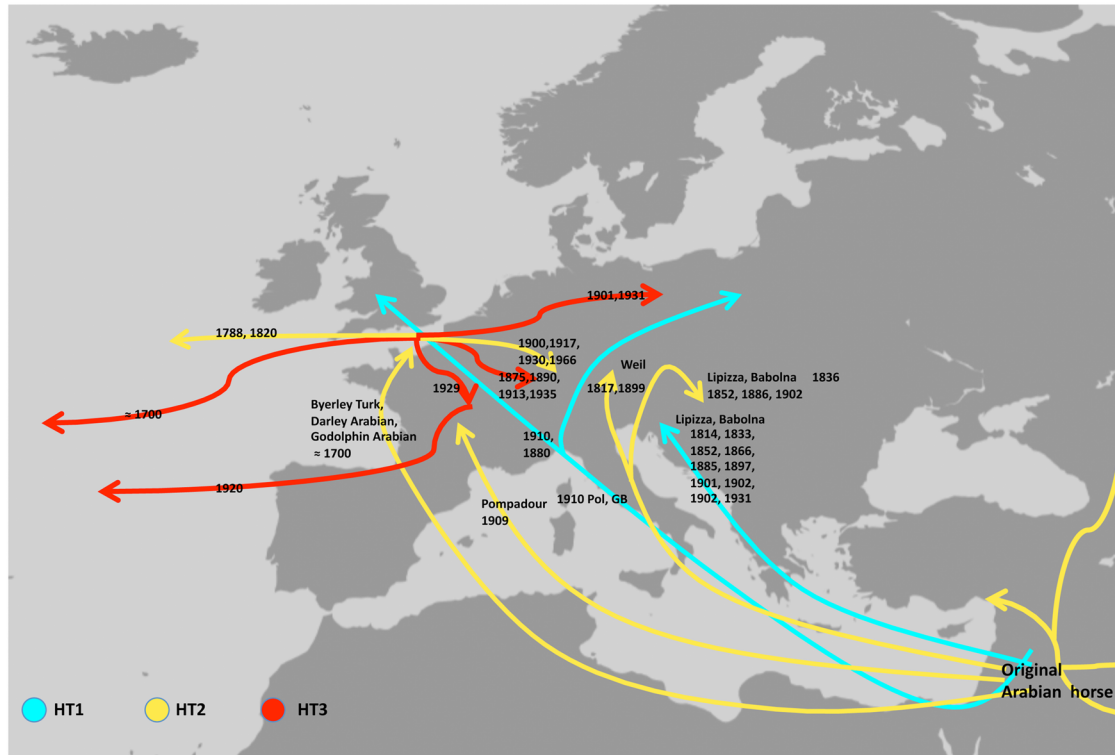

Supplement: S10 (10.1371/journal.pone.0060015.s010) [file journal.pone.0060015.s010]
